# Supplementary material for: Proteomic Profiling of Extracellular Vesicles Derived from Cerebrospinal Fluid of Alzheimer’s Disease Patients: A Pilot Study
Source: MDPI journal article supplement (doi:10.3390/cells9091959), 2020-08-25
Supplement: s1 [file s1]

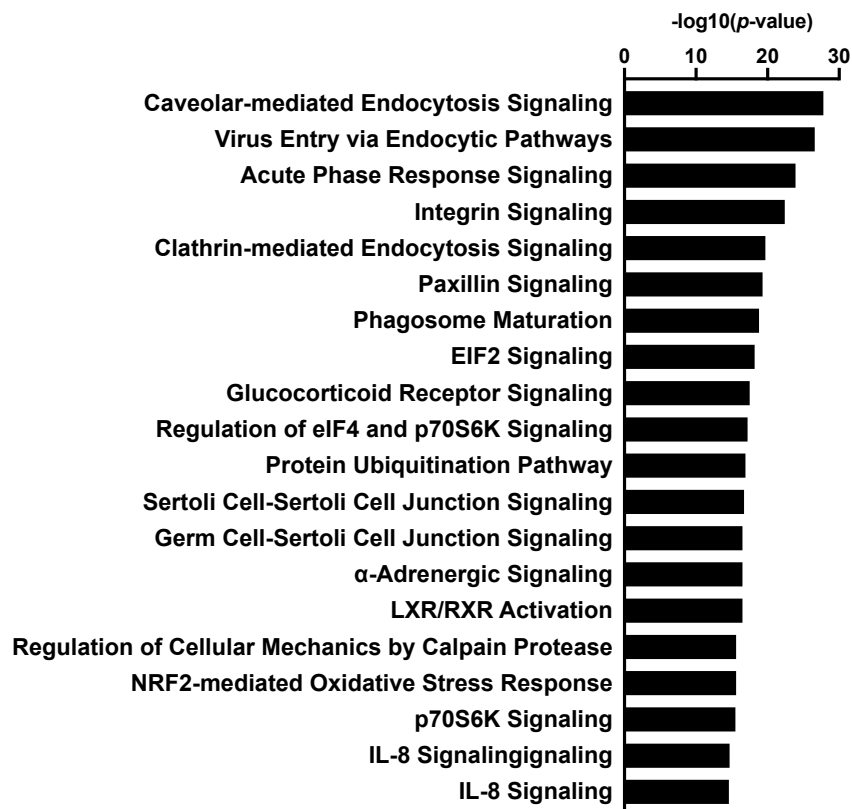

**Supplementary Figure S1.** The canonical pathway of identified proteins by TMT-labeling quantitative proteomics in IPA.

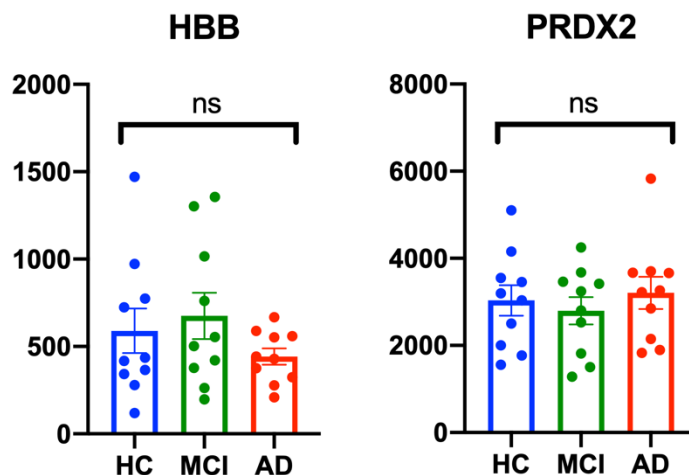

**Supplementary Figure S2.** Quantitative analysis of HBB and PRDX2. ns: no significance as determined by one-way ANOVA. Outlier identifier with “Robust nonlinear regression and Outlier removal method” (ROUT, Q = 1%) detected no outlier among tested samples (Prism 8, GraphPad).

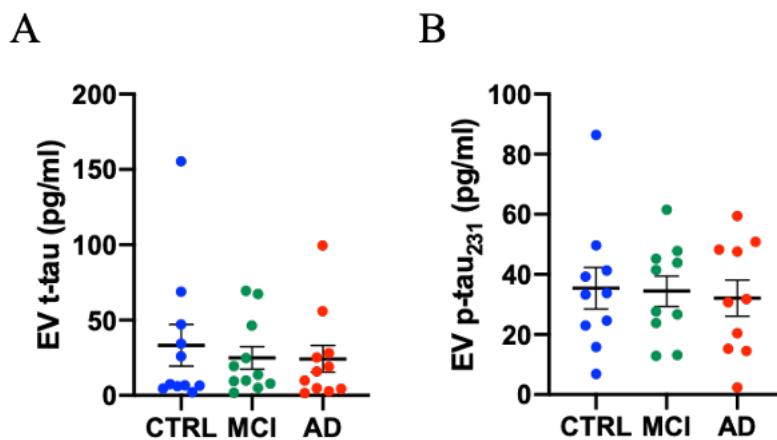

**Supplementary Figure S3.** Comparison of total tau and tau phosphorylated at threonine 231 in EVs among AD, MCI and CTRL: **A)** total tau; there is no significantly different. **B)** p-tau<sub>231</sub>; there is no significant difference among groups (A, B).
